# Supplementary material for: CRISPR-Cas9 Screen Identifies DYRK1A as a Target for Radiotherapy Sensitization in Pancreatic Cancer
Source: MDPI journal article supplement (doi:10.3390/cancers14020326), 2022-01-10
Supplement: s1 [file s1]

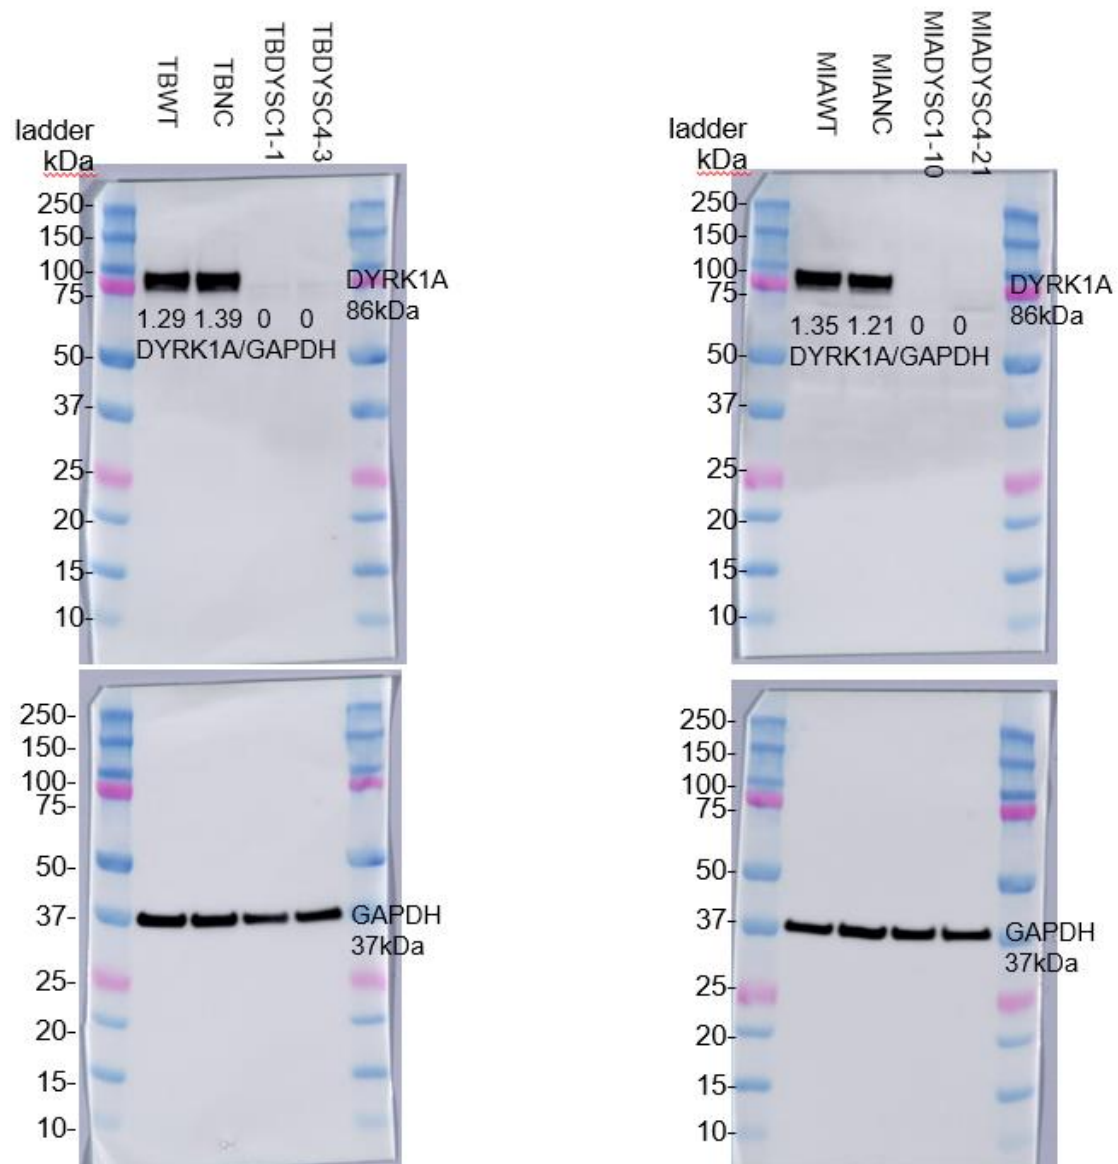

**Figure S1.** Western blot of TB32047 and MIA PaCa-2 cells transfected with DYRK1A sgRNAs or non-targeting control.

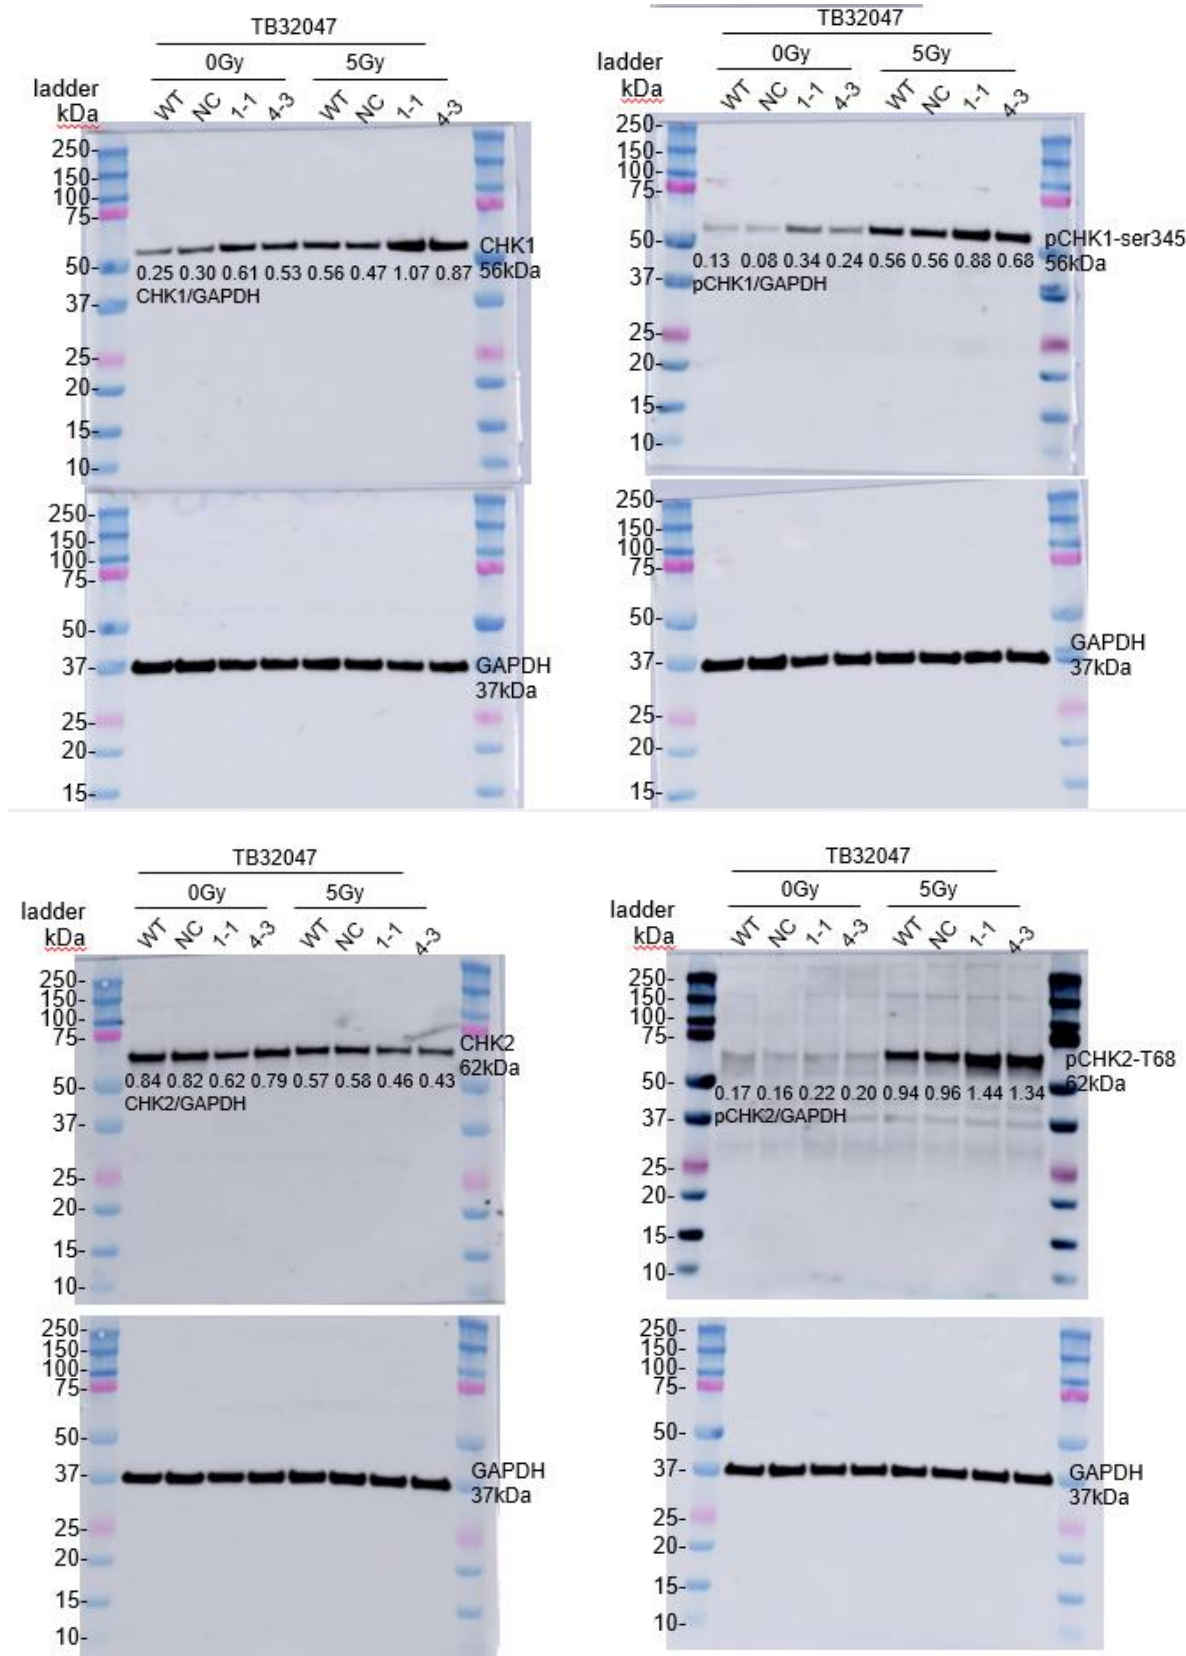

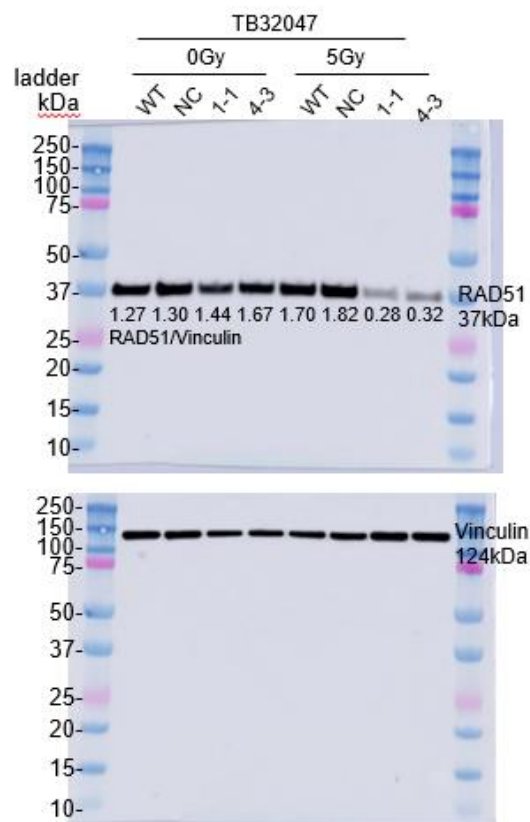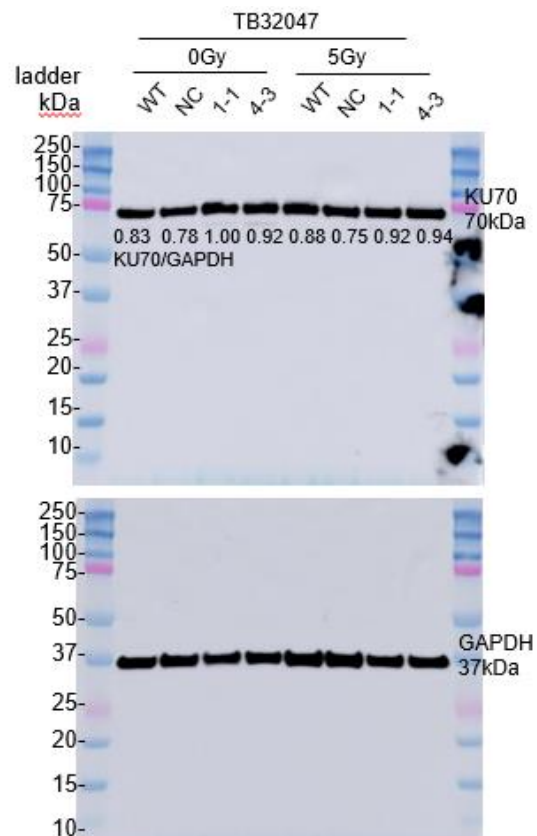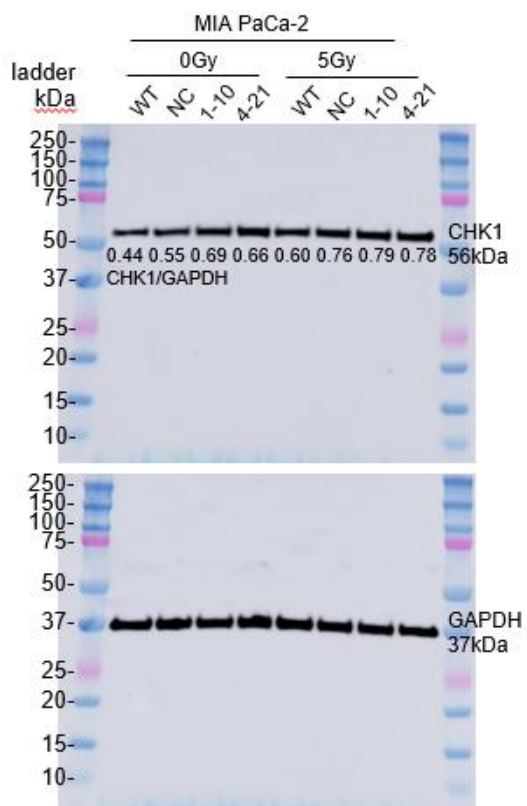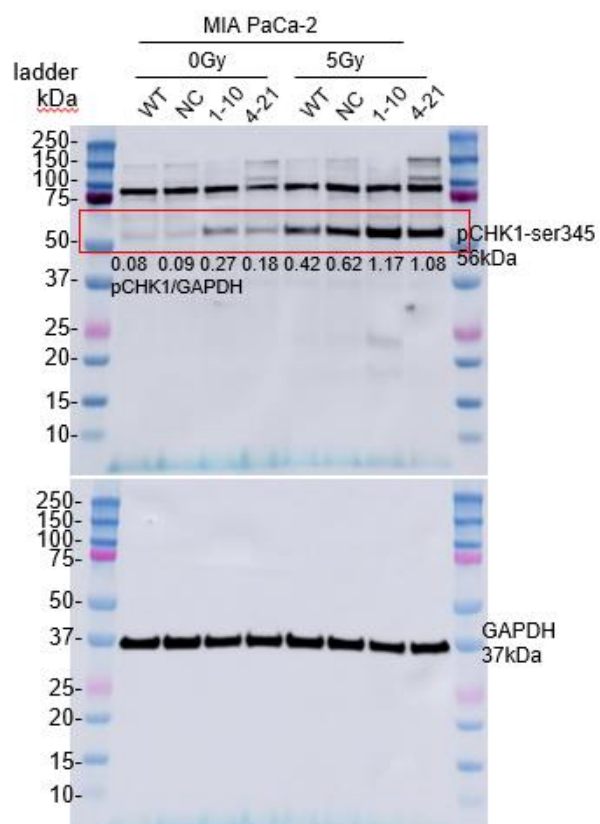

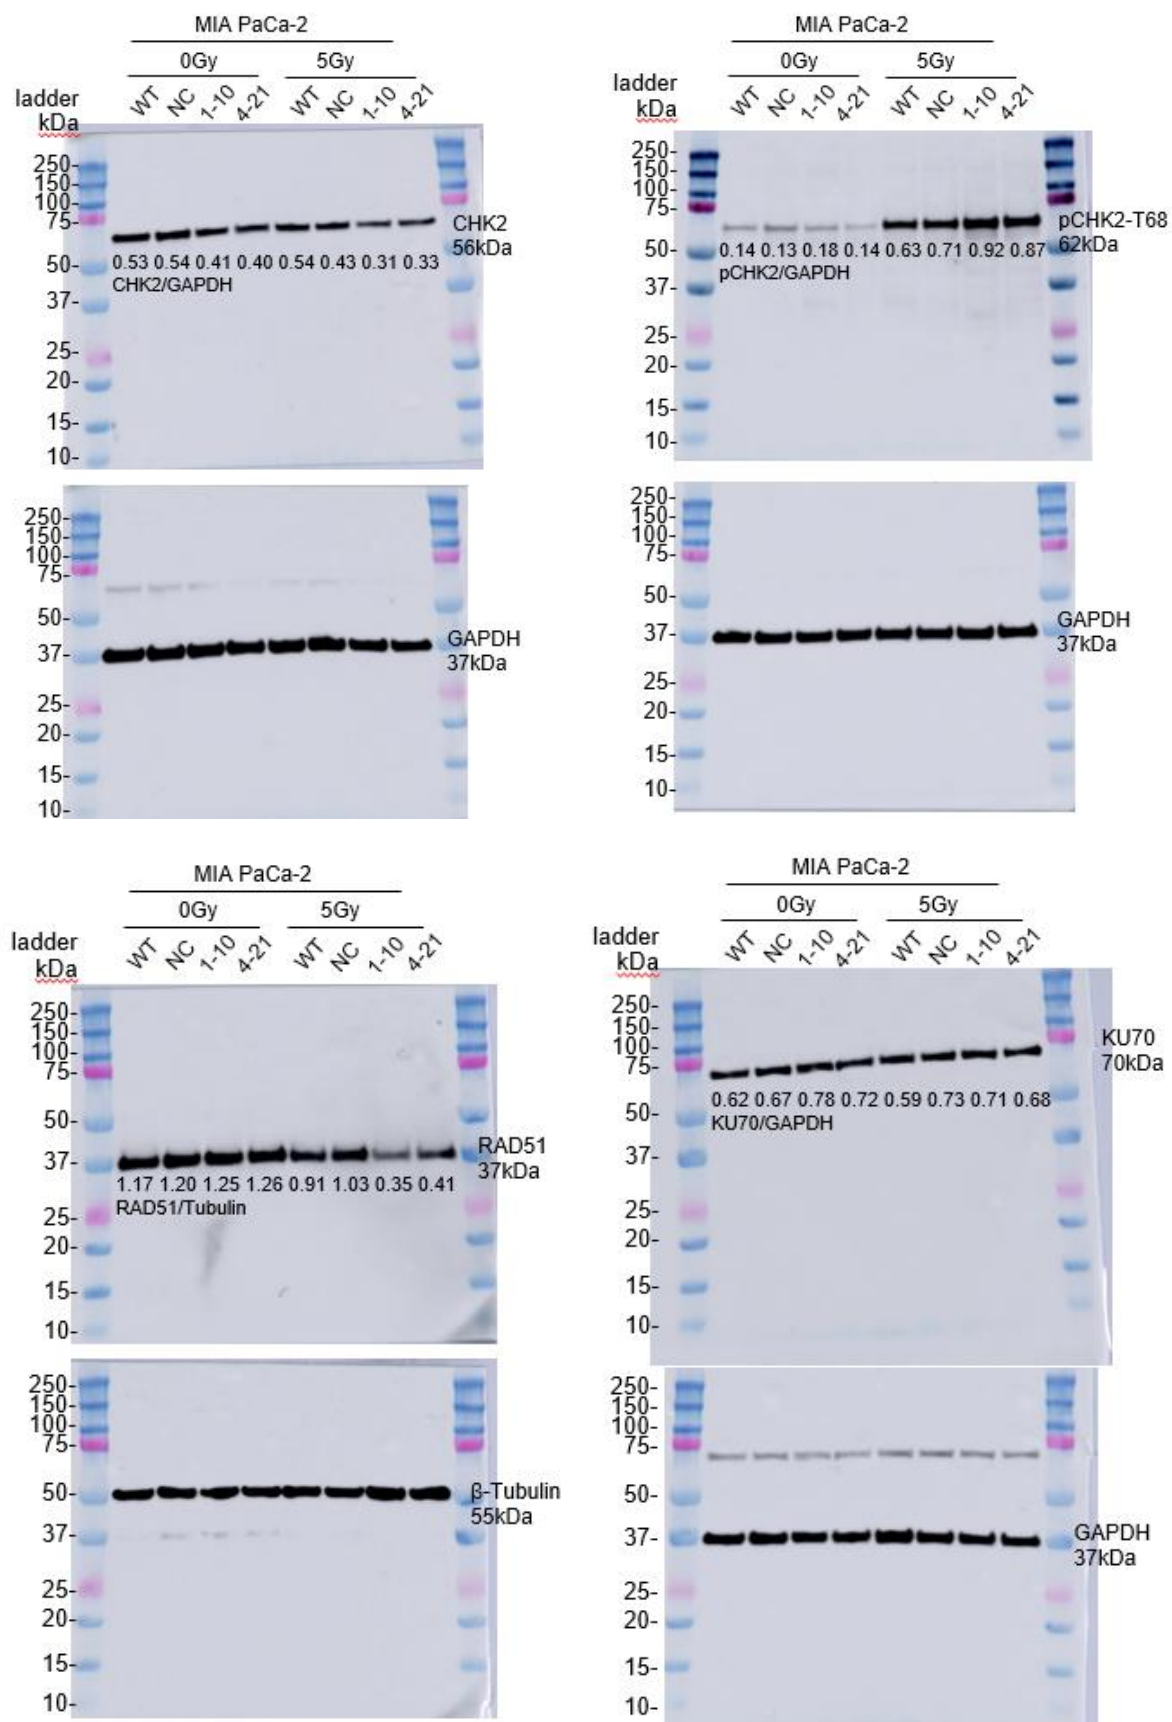

**Figure S2.** Western blot of TB32047 and MIA PaCa-2 control or DYRK1A KO single clone cells with 0 Gy or 5 Gy irradiation after 24 h.



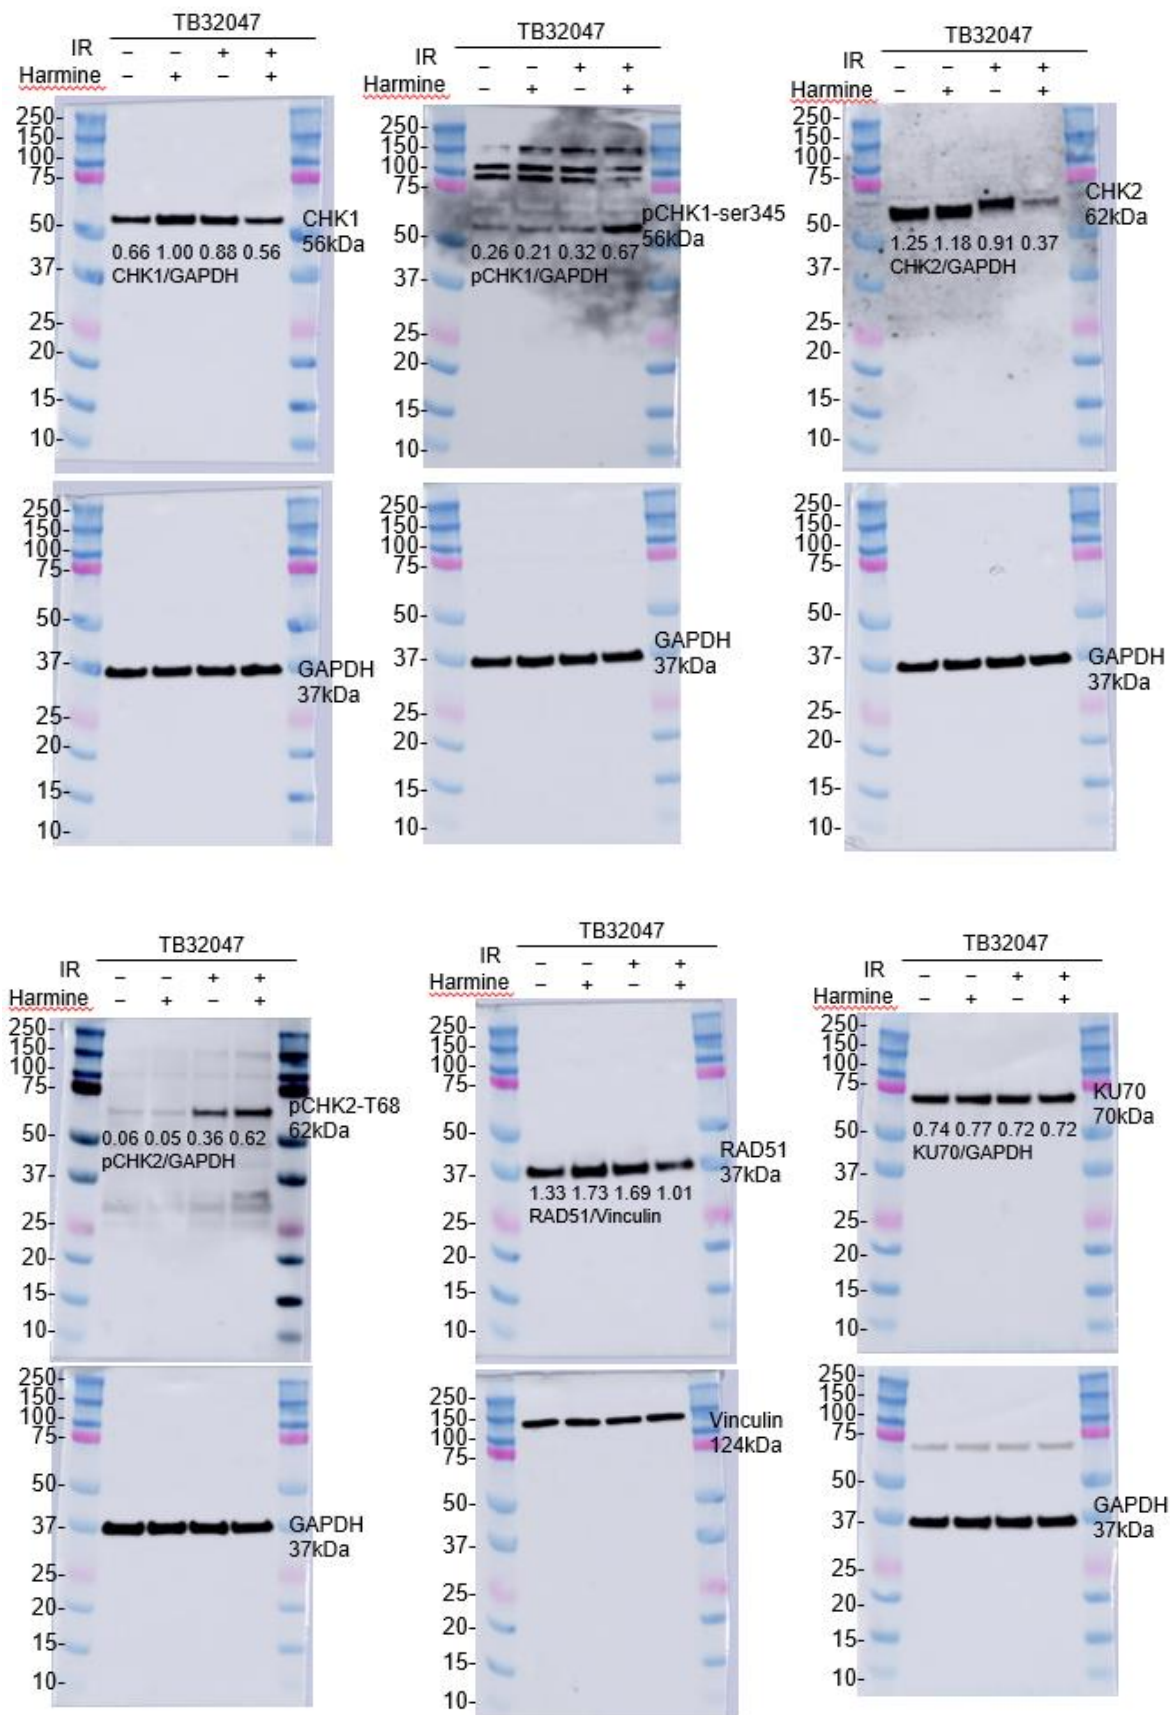

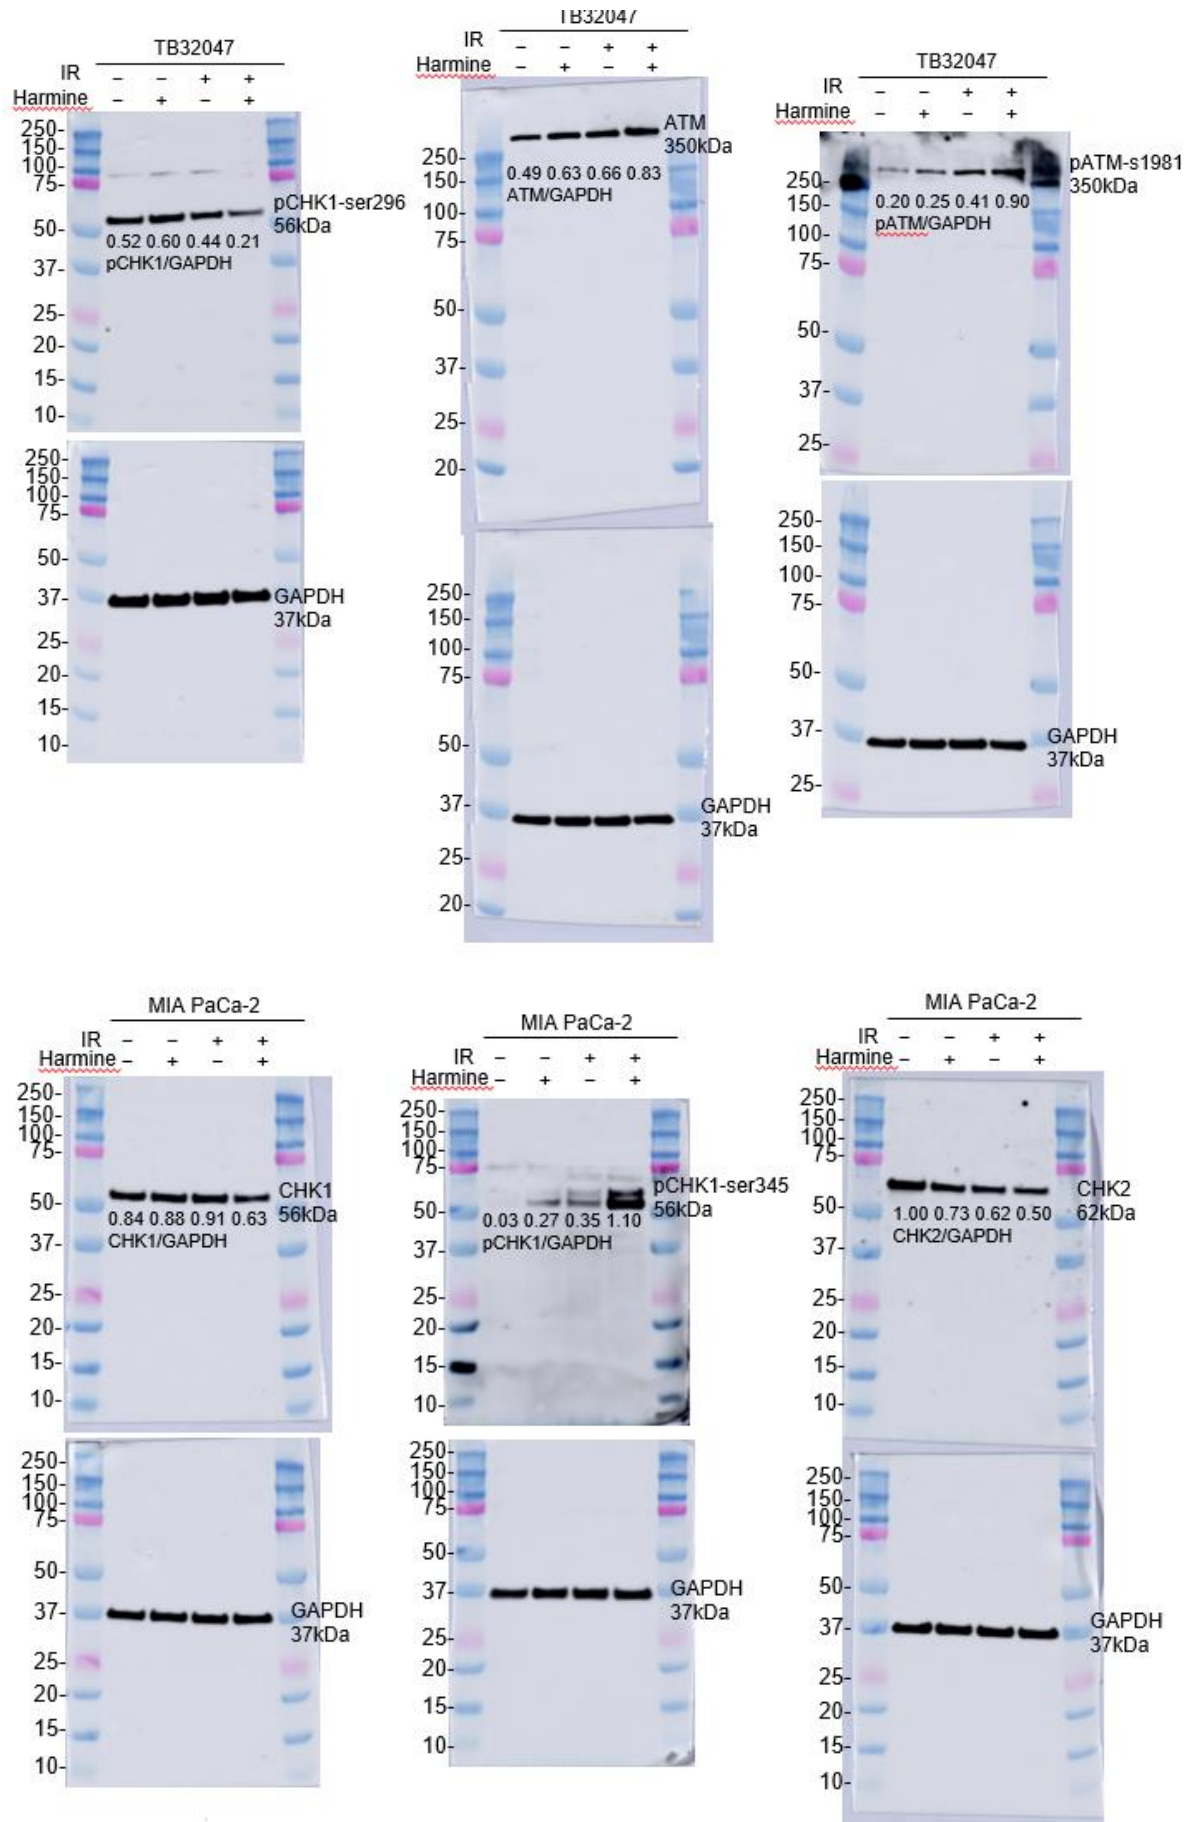

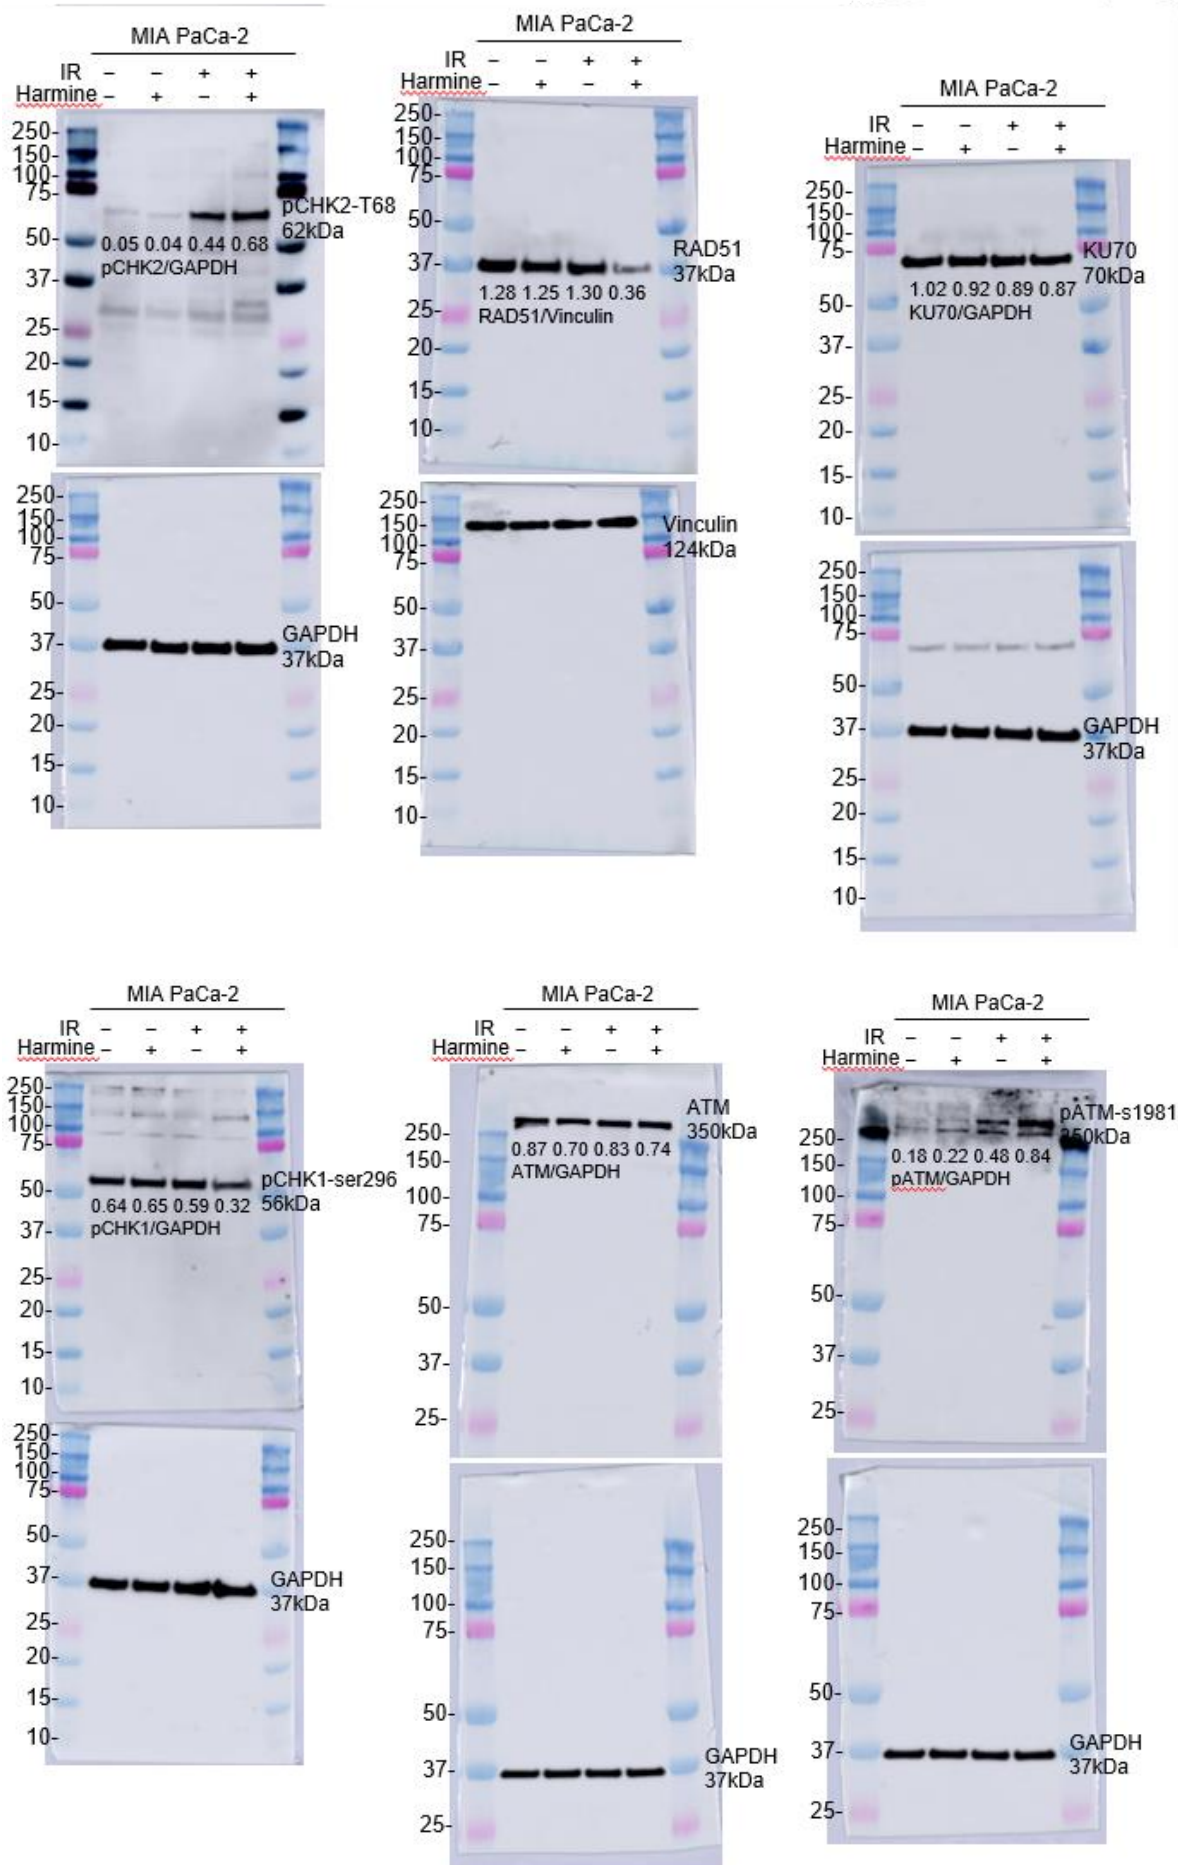

**Figure S3.** Western blot of TB32047 and MIA PACA-2 treated with inhibitor alone, X-rays alone, or their combination.
